# Supplementary material for: Model for regional collaboration: Successful strategy to implement a pediatric early warning system in 36 pediatric oncology centers in Latin America
Source: PubMed Central journal article supplement — Cancer. 2022 Sep 26;128(22):4004–16. doi: 10.1002/cncr.34427 (PMC9828186; doi:10.1002/cncr.34427), 2022-09-26
Supplement: CNCR-128-4004-s001.pdf [file CNCR-128-4004-s001.pdf]

## Supplemental Material

### **Model for Regional Collaboration: Successful Strategy to Implement a Pediatric Early Warning System in 36 Pediatric Oncology Centers in Latin America**

Asya Agulnik<sup>1</sup>; Alejandra Gonzalez Ruiz<sup>1</sup>; Hilmarie Muniz-Talavera<sup>1</sup>; Angela K. Carrillo<sup>1</sup>; Adolfo Cárdenas<sup>1</sup>; Maria Puerto-Torres<sup>1</sup>; Marcela Garza<sup>1</sup>; Tania Conde<sup>2</sup>; Dora Soberanis<sup>3</sup>; Alejandra Méndez<sup>3</sup>; Carlos Acuña Aguirre<sup>4</sup>; Yvania Alfonso<sup>5</sup>; Shillel Yahamy Álvarez Arellano<sup>6</sup>; Deiby Argüello Vargas<sup>7</sup>; Rosario Batista<sup>8</sup>; Erika Esther Blasco Arriaga<sup>9</sup>; Mayra Chávez Ríos<sup>10</sup>; María Elena Cuencio Rodríguez<sup>11</sup>; Ever Amilcar Fing Soto<sup>12</sup>; Wendy Gómez-García<sup>13</sup>; Rafael H. Guillén Villatoro<sup>14</sup>; María de Lourdes Gutiérrez Rivera<sup>15</sup>; Martha Herrera Almanza<sup>16</sup>; Yajaira V. Jimenez Antolinez<sup>17</sup>; Susana Juárez<sup>18</sup>; Norma Araceli López Facundo<sup>19</sup>; Ruth Angélica Martínez Soria<sup>20</sup>; Kenia Miller<sup>21</sup>; Scheybi Miralda<sup>22</sup>; Roxana Morales<sup>23</sup>; Natalia Negroe Ocampo<sup>24</sup>; Alejandra Osuna<sup>25</sup>; Claudia Pascual Morales<sup>26</sup>; Clara Krystal Pérez Fermin<sup>27</sup>; Carlos M. Pérez Alvarado<sup>28</sup>; Estuardo Pineda<sup>29</sup>; Carlos Andrés Portilla<sup>30</sup>; Ligia Estefanía Ríos López<sup>31</sup>; Jocelyn Rivera<sup>32</sup>; Arely Saraí Sagaón Olivares<sup>33</sup>; Mélida Cristina Saguy Tacuri<sup>34</sup>; Beatriz T. Salas Mendoza<sup>35</sup>; Ivel Solano Picado<sup>36</sup>; Verónica Soto Chávez<sup>37</sup>; Isidoro Tejocote Romero<sup>38</sup>; Daniel Tatay<sup>39</sup>; Juliana Teixeira Costa<sup>40</sup>; Erika Villanueva<sup>41</sup>; Marielba Villegas Pacheco<sup>42</sup>; Virginia McKay<sup>43</sup>; Monika L. Metzger<sup>1</sup>; Paola Friedrich<sup>1</sup>; Carlos Rodriguez-Galindo<sup>1</sup>, on behalf of the EVAT Study Group

| <b>Supplemental Material</b>                                                   | <b>Page #</b> |
|--------------------------------------------------------------------------------|---------------|
| Supplemental Figure 1: Map of Proyecto EVAT Centers                            | 2             |
| Supplemental Table 1: Data collected by centers participating in Proyecto EVAT | 3             |
| Supplemental Figure 2: English version of PEWS (EVAT) scoring tool             | 4             |
| Supplemental Figure 3: English version of PEWS (EVAT) sample action algorithm  | 5             |
| Supplemental Figure 4: Sample staff PEWS satisfaction survey                   | 6             |

Supplemental Figure 1: Map of Proyecto EVAT Centers

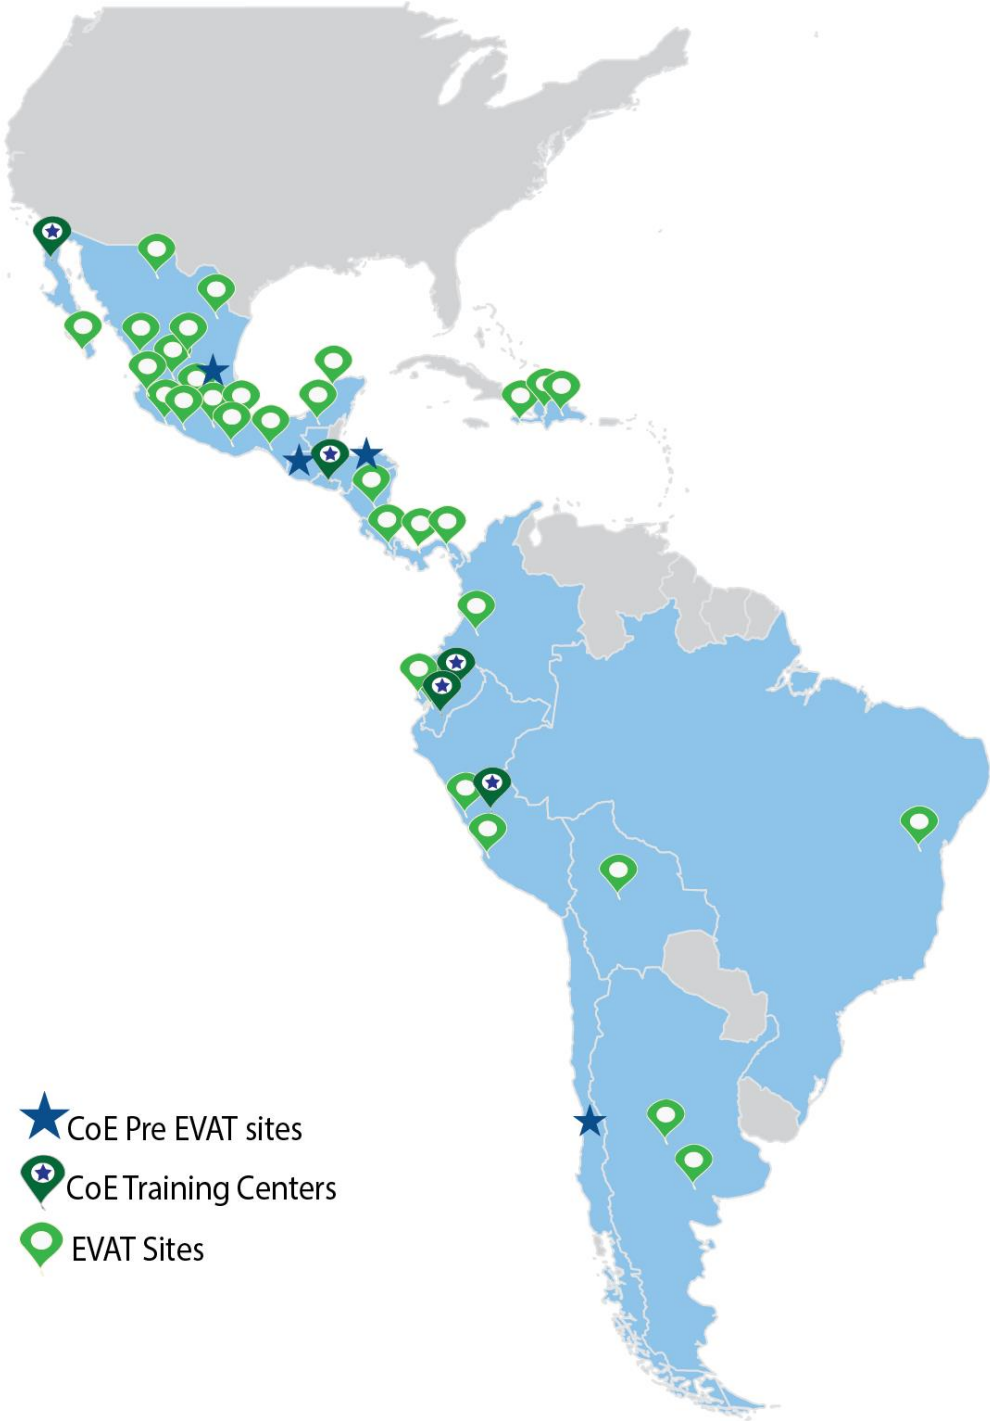

**Supplemental Table 1: Clinical and Implementation Outcomes Assessed by Proyecto EVAT Centers**

| KTA Phase                   | Type             | Measure                            | Definition                                                                                                                                                                                       | Collection Method                                                                                                                                                                                                                                  |
|-----------------------------|------------------|------------------------------------|--------------------------------------------------------------------------------------------------------------------------------------------------------------------------------------------------|----------------------------------------------------------------------------------------------------------------------------------------------------------------------------------------------------------------------------------------------------|
| Identify the Problem        | Clinical Outcome | Clinical Deterioration Event (CDE) | An unplanned ICU transfer, use of ICU intervention (vasoactive infusion, mechanical ventilation, CPR) on the ward, or non-palliative ward death                                                  | Prospective quality improvement registry of all CDEs, including characteristics and outcomes                                                                                                                                                       |
|                             |                  | Patient Volume                     | Monthly pediatric hematology-oncology ward admissions and non-ICU inpatient hospital days                                                                                                        | Collected monthly from hospital census                                                                                                                                                                                                             |
| Assess Barriers to PEWS Use | Assessment       | SWOT Analysis                      | A center’s resources along with strengths, weaknesses, opportunities, and threats to managing critical illness in children with cancer                                                           | Structured assessment conducted by the local PEWS implementation team of each center prior to implementing PEWS with feedback provided by Proyecto EVAT expert mentorship team                                                                     |
|                             |                  | Stakeholder Analysis               | All clinical and operational stakeholders important to PEWS implementation along with their current support or resistance to the program                                                         |                                                                                                                                                                                                                                                    |
| Monitor PEWS Use            | Process          | Quality of PEWS Use                | Correct PEWS use defined by 3 types of errors: (1) <i>omissions</i> (documented vital signs without using PEWS), (2) errors in PEWS <i>scoring</i> , and (3) PEWS <i>algorithm</i> nonadherence. | Regular (2-3x/week) review of all nursing vital signs and PEWS documentation in all currently hospitalized patients collected by the local PEWS implementation team and aggregated monthly during pilot, implementation, and sustainability phases |
|                             |                  | Implementation Completion          | High-quality PEWS use defined as less than 15% in all 3 types of PEWS use errors for at least 2 consecutive months                                                                               |                                                                                                                                                                                                                                                    |
|                             | Balancing        | Red PEWS                           | Any patient with a PEWS score of 5 or greater since the start of the PEWS pilot                                                                                                                  |                                                                                                                                                                                                                                                    |
| Evaluate Outcomes           | Impact           | Staff Satisfaction                 | Survey of clinical staff (physician and nurses) satisfaction and comfort with PEWS use (see Supplemental Figure 4 for example)                                                                   | Anonymous survey of all staff using PEWS after the PEWS pilot and as needed during implementation                                                                                                                                                  |
|                             |                  | Staff Trained                      | Number of clinical staff (nurses, physicians) trained in using PEWS at each center                                                                                                               | Documented by local PEWS implementation team during each PEWS training and onboarding of new staff                                                                                                                                                 |
|                             |                  | External Presentations             | Presentations given by local implementation leaders about PEWS outside of their institution                                                                                                      | Collected by Proyecto EVAT leadership team through survey of all collaborating centers                                                                                                                                                             |

**Abbreviations:** CPR- Cardiopulmonary Resuscitations, ICU-Intensive Care Unit, PEWS-Pediatric Early Warning System

Supplemental Figure 2. English version of PEWS (EVAT) scoring tool

| <b>Escala de Valoración de Alerta Temprana (EVAT)</b> |                                                                                                                                                                              |                                                                                                                                                                                                                                           |                                                                                                                                                                                                                                                                                                   |                                                                                                                                                                                                                                                                                                                                                                                                 |               |
|-------------------------------------------------------|------------------------------------------------------------------------------------------------------------------------------------------------------------------------------|-------------------------------------------------------------------------------------------------------------------------------------------------------------------------------------------------------------------------------------------|---------------------------------------------------------------------------------------------------------------------------------------------------------------------------------------------------------------------------------------------------------------------------------------------------|-------------------------------------------------------------------------------------------------------------------------------------------------------------------------------------------------------------------------------------------------------------------------------------------------------------------------------------------------------------------------------------------------|---------------|
|                                                       | <b>0</b>                                                                                                                                                                     | <b>1</b>                                                                                                                                                                                                                                  | <b>2</b>                                                                                                                                                                                                                                                                                          | <b>3</b>                                                                                                                                                                                                                                                                                                                                                                                        | <b>Result</b> |
| <b>Behavior / Neurologic</b>                          | <ul style="list-style-type: none"> <li>Alert/Sleeping appropriately</li> <li>Patient is at baseline state of alertness</li> </ul>                                            | <ul style="list-style-type: none"> <li>Sleepy, drowsy when not stimulated</li> <li>Responds only to verbal stimuli</li> </ul>                                                                                                             | <ul style="list-style-type: none"> <li>Irritable, difficult to console</li> <li>Responds only to painful stimuli</li> </ul>                                                                                                                                                                       | <ul style="list-style-type: none"> <li>Lethargic, confused, without strength</li> <li>Unresponsive</li> <li>Seizures</li> <li>Unreactive pupils or with anisocoria</li> </ul>                                                                                                                                                                                                                   |               |
| <b>Cardiovascular</b>                                 | <ul style="list-style-type: none"> <li>Appropriate skin color for patient</li> <li>Capillary refill <math>\leq</math> 2 seconds</li> <li>Normal peripheral pulses</li> </ul> | <ul style="list-style-type: none"> <li>Pale</li> <li>Vasodilated</li> <li>Capillary refill 3-4 seconds</li> <li>Mild tachycardia*</li> </ul>                                                                                              | <ul style="list-style-type: none"> <li>Capillary refill 4-5 seconds</li> <li>Moderate Tachycardia*</li> <li>Diminished peripheral pulses</li> </ul>                                                                                                                                               | <ul style="list-style-type: none"> <li>Mottled</li> <li>Fill capillary &gt; 5 seconds</li> <li>Severe tachycardia*</li> <li>Symptomatic bradycardia</li> <li>Irregular rhythm (not sinus)</li> </ul>                                                                                                                                                                                            |               |
| <b>Respiratory</b>                                    | <ul style="list-style-type: none"> <li>Within normal parameters</li> <li>No retractions</li> <li>Normal breathing pattern</li> <li>Saturation &gt;95%</li> </ul>             | <ul style="list-style-type: none"> <li>Mild tachypnea*</li> <li>Mild work of breathing (nasal flaring, intercostal retraction)</li> <li>Up to 1 L of oxygen via nasal cannula (NC)</li> <li>Saturation 90% -94% without oxygen</li> </ul> | <ul style="list-style-type: none"> <li>Moderate tachypnea*</li> <li>Moderate work of breathing (nasal flaring, intercostal retraction, grunting, use of accessory muscles)</li> <li>1-3 L of oxygen via NC</li> <li>Nebulization every 4 hrs</li> <li>Saturation 88-89% without oxygen</li> </ul> | <ul style="list-style-type: none"> <li>Severe tachypnea*</li> <li>Respiratory rate below normal for age*</li> <li>Severe work of breathing (head-bobbing, thoraco-abdominal dissociation)</li> <li>Oxygen via facemask with reservoir (not post-sop)</li> <li>&gt; 3 L oxygen via NC</li> <li>Nebulization &gt; every 4 hours</li> <li>Saturation &lt;90% with oxygen</li> <li>Apnea</li> </ul> |               |
| <b>Nurse concern</b>                                  | Not concerned                                                                                                                                                                | Concerned                                                                                                                                                                                                                                 |                                                                                                                                                                                                                                                                                                   |                                                                                                                                                                                                                                                                                                                                                                                                 |               |
| <b>Family concern</b>                                 | Not concerned and present                                                                                                                                                    | Concerned or absent                                                                                                                                                                                                                       |                                                                                                                                                                                                                                                                                                   |                                                                                                                                                                                                                                                                                                                                                                                                 |               |
| <b>TOTAL</b>                                          |                                                                                                                                                                              |                                                                                                                                                                                                                                           |                                                                                                                                                                                                                                                                                                   |                                                                                                                                                                                                                                                                                                                                                                                                 |               |

\* Please refer to Heart Rate and Respiratory Reference Tool

Based on Bonafide C, et al. Development of Heart and Respiratory Rate Percentile Curves for Hospitalized Children. Pediatrics 2013;131:e1150.

|                                        | <b>Mild</b>                | <b>Moderate</b>            | <b>Severe</b>             |
|----------------------------------------|----------------------------|----------------------------|---------------------------|
| <b>Respiratory rate and heart rate</b> | 90-95th percentile for age | 95-99th percentile for age | > 99th percentile for age |

Supplemental Figure 3. English version of PEWS (EVAT) sample action algorithm

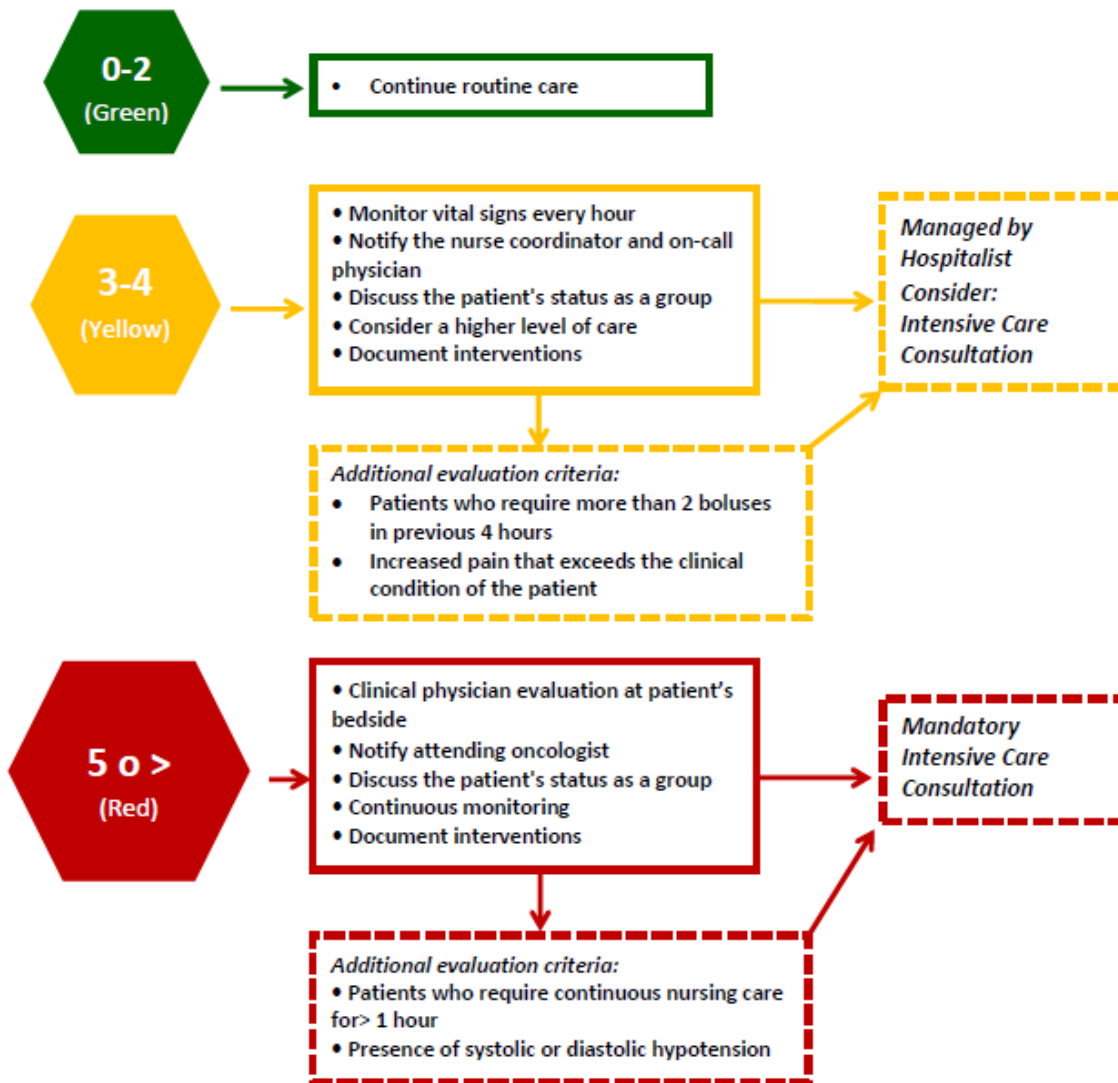

**For immediate assistance at any time:  
CALL the PICU: 255**

**Supplemental Figure 4: Sample staff PEWS satisfaction survey**

**Instructions:**

The following survey was designed to evaluate nursing satisfaction with the implementation of EVAT. Please read the survey and answer each question honestly. The survey is anonymous. Thank you in advance for your participation.

Level of Nursing:                      Licensed                      Technician                      Auxiliary  
 Unit: \_\_\_\_\_ Years of Experience: \_\_\_\_\_

|                                                              | Strongly Disagree | Disagree | Agree | Strongly Agree |
|--------------------------------------------------------------|-------------------|----------|-------|----------------|
| I understand how to use the EVAT scoring tool and algorithm. | 1                 | 2        | 3     | 4              |
| I use EVAT in the routine care of my patients.               | 1                 | 2        | 3     | 4              |
| EVAT helps me carry out my work better.                      | 1                 | 2        | 3     | 4              |
| EVAT adequately predicts the deterioration of patients.      | 1                 | 2        | 3     | 4              |
| The training that I received is adequate for me to use EVAT. | 1                 | 2        | 3     | 4              |
| EVAT is difficult to understand                              | 1                 | 2        | 3     | 4              |
| EVAT is difficult to implement                               | 1                 | 2        | 3     | 4              |

1. Do you use EVAT with each patient? Describe why yes or why no.
2. Do you understand how to use EVAT?
3. Is EVAT a useful tool? Please, describe why yes or why no.
4. What makes EVAT difficult to use? How can we help to resolve these challenges?

Please circle the factors that you consider to be important obstacles to using EVAT frequently in your work.

|                                                    | Very Significant Obstacle | Significant Obstacle | Small Obstacle | Not an obstacle |
|----------------------------------------------------|---------------------------|----------------------|----------------|-----------------|
| Time                                               | 1                         | 2                    | 3              | 4               |
| Number of admissions/discharges                    | 1                         | 2                    | 3              | 4               |
| Nursing to Patient ratio                           | 1                         | 2                    | 3              | 4               |
| Availability of PEWS tools of reference or consult | 1                         | 2                    | 3              | 4               |
| Other:                                             | 1                         | 2                    | 3              | 4               |

5. Please write other things that affect your ability to use EVAT in daily practice.
6. I need more training to use EVAT correctly with my patients, yes or no?
7. Additional comments:
